# Supplementary material
Source: PubMed Central journal article supplement (PMC6484809)
Supplement: jama-321-1481-s003.pdf [file jama-321-1481-s003.pdf]

## **Data Sharing Statement**

### **Data**

**Data available:** Yes

**Data types:** Deidentified participant data, Data dictionary

**How to access data:** National Cancer Institute

**When available:** beginning date: 07-01-2019

### **Supporting Documents**

**Document types:** None

### **Additional Information**

**Who can access the data:** Anyone requesting the data.

**Types of analyses:** Any purpose

**Mechanisms of data availability:** Without investigator support
